# Supplementary material
Source: PubMed Central journal article supplement (PMC5031177)
Supplement: supp_2015-0337_Supplemental_Figure.pdf [file supp_2015-0337_Supplemental_Figure.pdf]

Supplemental Figure – English et al.

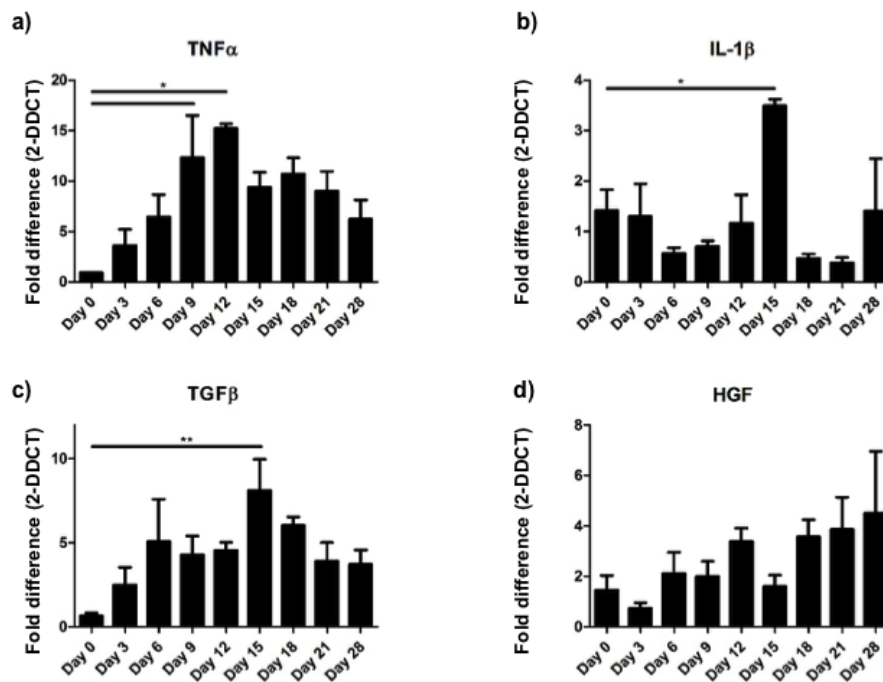

Figure S1. mRNA expression analysis of inflammatory and fibrotic genes; Bleomycin time course.

C57BL/6 mice were treated with bleomycin by IN administration. Four mice were sacrificed every 3 days for 28 days and the lungs were processed for RNA isolation. Following cDNA synthesis, real time PCR was run for a) TNF- $\alpha$  b) IL-1 $\beta$  c) TGF $\beta$  and d) HGF. The results were graphed and analysed for statistical difference (\*,  $p < 0.05$ ; \*\*,  $p < 0.01$ ).
